# Supplementary material
Source: MDPI journal article supplement (https://www.mdpi.com/2073-4433/12/8/1009)
Supplement: s1 [file s1]

# Supplementary Materials

## Ambient PM<sub>2.5</sub> and Daily Hospital Admissions for Acute Respiratory Infections: Effect Modification by Weight Status of Child

Hironori Nishikawa <sup>1,\*</sup>, Chris Fook Sheng Ng <sup>1</sup>, Lina Madaniyazi <sup>1,2</sup>, Xerxes Tesoro Seposo <sup>1</sup>, Bhim Gopal Dhoubhadel <sup>1,3</sup>, Dhiraj Pokhrel <sup>4</sup>, Amod K. Pokhrel <sup>4</sup>, Sharat Chandra Verma <sup>4</sup>, Dhruba Shrestha <sup>5</sup>, Ganendra Bhakta Raya <sup>5</sup>, and Masahiro Hashizume <sup>1,6</sup>

<sup>1</sup> Department of Global Health, School of Tropical Medicine and Global Health, Nagasaki University, 1-12-4 Sakamoto, Nagasaki 852-8523, Japan; chrisng@nagasaki-u.ac.jp (C.F.S.N.); lina.madaniyazi@nagasaki-u.ac.jp (L.M.); seposoxerxes@nagasaki-u.ac.jp (X.T.S.); b-gopal@nagasaki-u.ac.jp (B.G.D.); hashizume@m.u-tokyo.ac.jp (M.H.)

<sup>2</sup> Department of Pediatric Infectious Disease, Institute of Tropical Medicine, Nagasaki University, 1-12-4 Sakamoto, Nagasaki 852-8523, Japan

<sup>3</sup> Department of Respiratory Infections, Institute of Tropical Medicine, Nagasaki University, 1-12-4 Sakamoto, Nagasaki 852-8523, Japan

<sup>4</sup> LEADERS Nepal, P.O. Box 8846, 3rd Floor Radhakuti Arcade, Putalisadak, Kathmandu 44600, Nepal; dhirajpokhrel@hotmail.com (D.P.); amodpokhrel@gmail.com (A.K.P.); verma\_sharat@yahoo.com (S.C.V.)

<sup>5</sup> Siddhi Memorial Hospital, Siddhi Memorial Foundation, P.O. Box 40, Bhimsensthan-7, Bhaktapur 44800, Nepal; dhrubashr@gmail.com (D.S.); ganendra.raya@gmail.com (G.B.R.)

<sup>6</sup> Department of Global Health Policy, School of International Health, Graduate School of Medicine, The University of Tokyo, 7-3-1 Hongo, Bunkyo-ku, Tokyo 113-0033, Japan

\* Correspondence: hironori.nishikawa@gmail.com

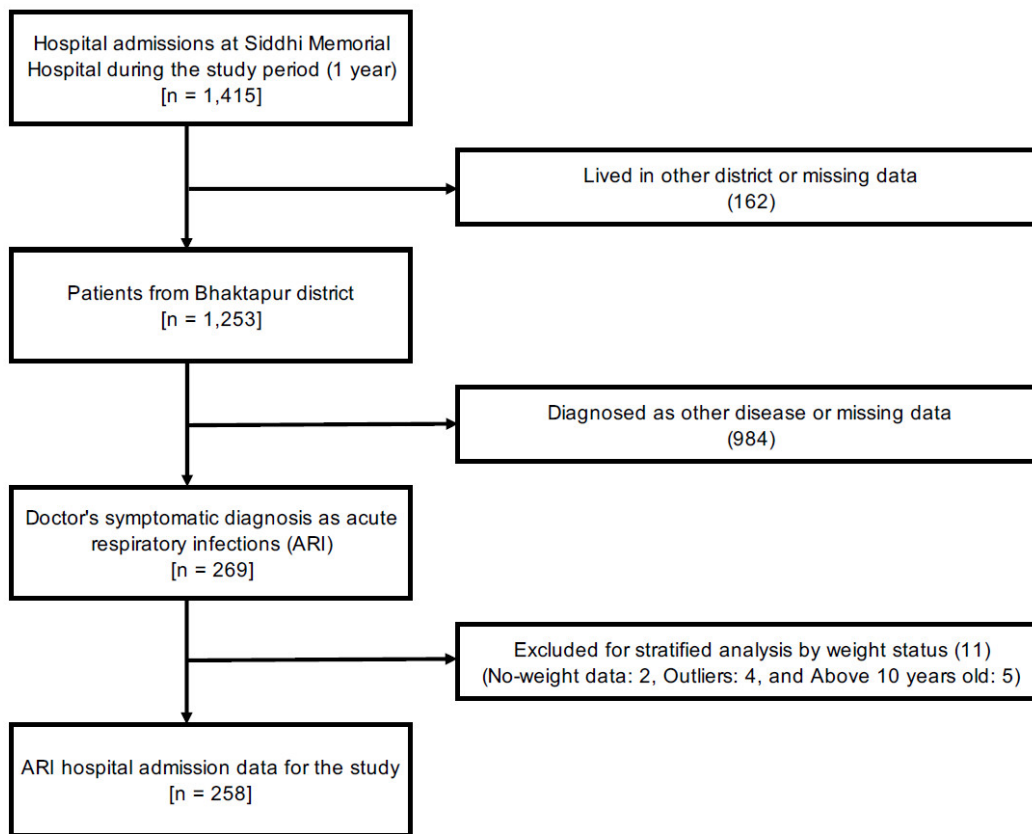

Figure S1: Inclusion and exclusion criteria of ARI admissions for the study

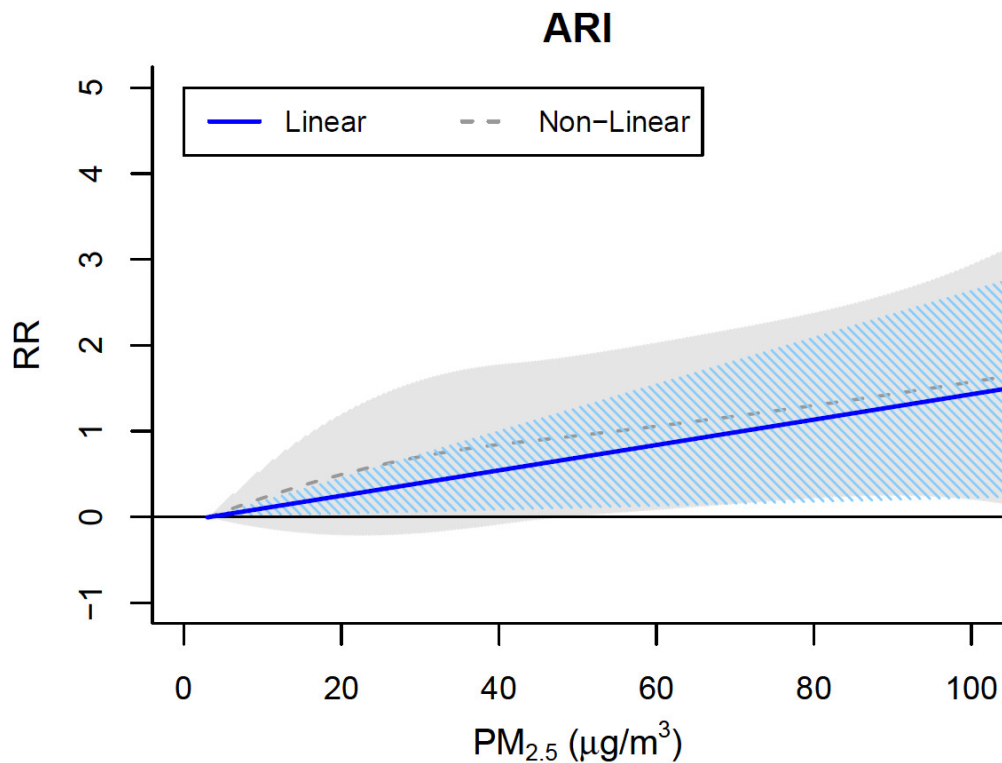

Figure S2: Linier and non-linear forms of concentration-response functions (CRFs) (difference of Akaike Information Criterion between the linear and non-linear model = 0.6)

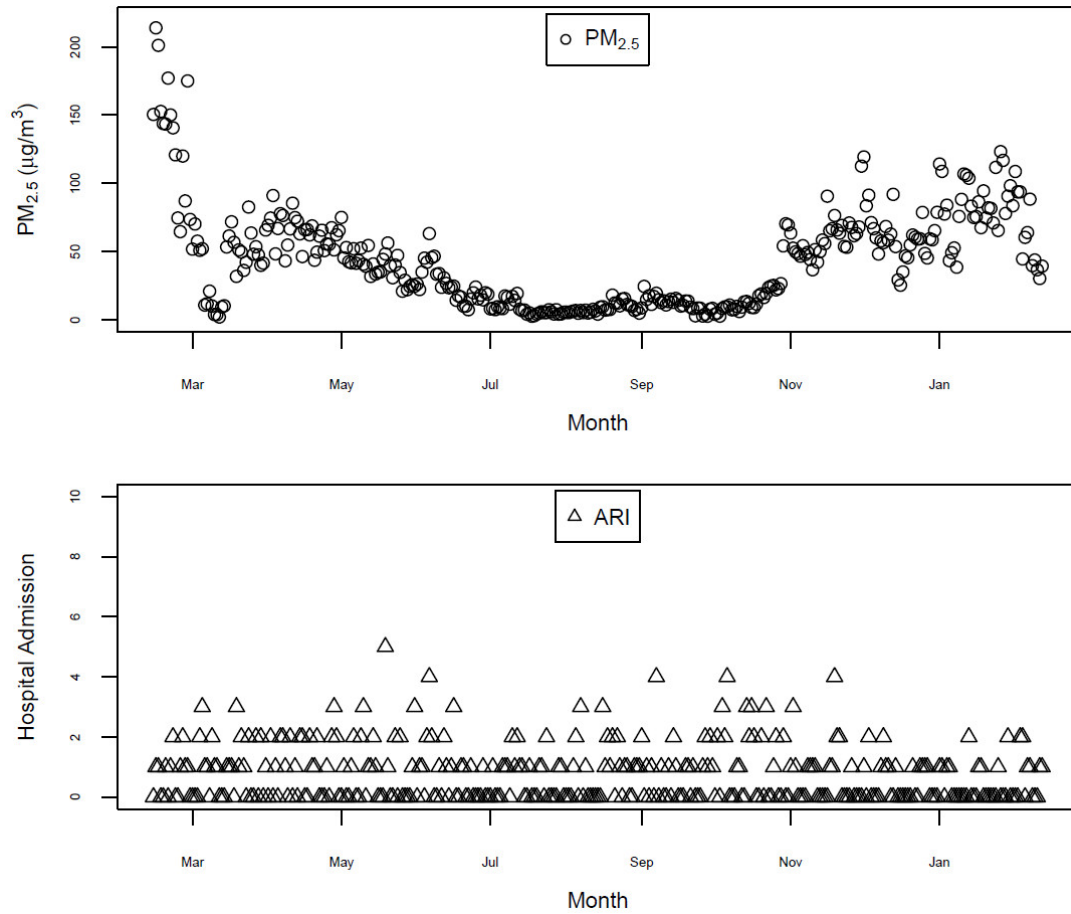

Figure S3: Time-series plot of PM<sub>2.5</sub> and ARI hospital admissions

Table S1: The relative risks (RR) and 95% Confidence Intervals (CI) for all ARI admissions and each weight group (Underweight, Normal weight, Overweight)

| Lag day /<br>Lag period | all ARI |                          | Underweight       |                   | Normal weight           |          | Overweight |          |
|-------------------------|---------|--------------------------|-------------------|-------------------|-------------------------|----------|------------|----------|
|                         | RR      | (95% CI)                 | RR                | (95% CI)          | RR                      | (95% CI) | RR         | (95% CI) |
| Single<br>lag           | lag0    | <b>1.1 (1.01-3 1.26)</b> | 1.1 (0.92-1 1.34) | 1.1 (1.00-1 1.24) | <b>1.5 (1.05-2.22)</b>  |          |            |          |
|                         | lag1    | <b>1.1 (1.00-2 1.25)</b> | 1.0 (0.89-8 1.32) | 1.1 (0.99-1 1.24) | <b>1.7 (1.14-2.64)</b>  |          |            |          |
|                         | lag2    | 1.0 (0.97-7 1.17)        | 1.0 (0.92-5 1.19) | 1.0 (0.97-6 1.17) | <b>1.8 (1.32-2.47)</b>  |          |            |          |
|                         | lag3    | 1.0 (0.96-5 1.15)        | 1.0 (0.94-7 1.22) | 1.0 (0.95-4 1.15) | <b>1.8 (1.31-2.66)</b>  |          |            |          |
|                         | lag4    | 1.0 (0.91-0 1.10)        | 0.9 (0.84-7 1.11) | 1.0 (0.91-0 1.11) | <b>2.1 (1.50-3.09)</b>  |          |            |          |
|                         | lag5    | 1.0 (0.94-3 1.13)        | 1.0 (0.93-8 1.26) | 1.0 (0.93-3 1.13) | <b>5.1 (2.47-10.88)</b> |          |            |          |
|                         | lag6    | 0.9 (0.91-9 1.08)        | 0.9 (0.80-5 1.12) | 0.9 (0.91-9 1.08) | <b>3.6 (2.09-6.37)</b>  |          |            |          |
|                         |         |                          |                   |                   |                         |          |            |          |
|                         |         |                          |                   |                   |                         |          |            |          |
|                         |         |                          |                   |                   |                         |          |            |          |

|                |      |                   |            |                   |                      |
|----------------|------|-------------------|------------|-------------------|----------------------|
| Average<br>lag | lag0 | <b>1.1 (1.02-</b> | 1.1 (0.90- | <b>1.1 (1.01-</b> | <b>1.7</b>           |
|                | 1    | <b>6 1.31)</b>    | 3 1.41)    | <b>4 1.30)</b>    | <b>7 (1.17-2.69)</b> |
|                | lag0 | <b>1.1 (1.01-</b> | 1.1 (0.91- | <b>1.1 (1.00-</b> | <b>1.9</b>           |
|                | 2    | <b>5 1.31)</b>    | 1 1.36)    | <b>4 1.30)</b>    | <b>8 (1.34-2.93)</b> |
|                | lag0 | <b>1.1 (1.01-</b> | 1.1 (0.92- | 1.1 (0.99-        | <b>2.3</b>           |
|                | 3    | <b>5 1.30)</b>    | 2 1.36)    | 3 1.30)           | <b>8 (1.50-3.78)</b> |
|                | lag0 | 1.1 (0.98-        | 1.0 (0.88- | 1.1 (0.97-        | <b>2.6</b>           |
|                | 4    | 3 1.29)           | 8 1.33)    | 2 1.29)           | <b>2 (1.63-4.22)</b> |
|                | lag0 | 1.1 (0.98-        | 1.1 (0.89- | 1.1 (0.97-        | <b>3.0</b>           |
|                | 5    | 3 1.30)           | 0 1.35)    | 2 1.30)           | <b>7 (1.81-5.21)</b> |
|                | lag0 | 1.1 (0.96-        | 1.0 (0.87- | 1.1 (0.95-        | <b>3.9</b>           |
|                | 6    | 1 1.28)           | 8 1.34)    | 0 1.27)           | <b>1 (2.08-7.34)</b> |
